# Supplementary material for: Construction of porphyrin-based conjugated microporous polymer through quaternization for efficient photodegradation of tetracycline and bisphenol A
Source: Royal Society of Chemistry journal article supplement (doi:10.1039/d5nj01362c), 2025-01-01
Supplement: d5nj01362c1.pdf [file d5nj01362c1.pdf]

## Supporting Information

Construction of porphyrin-based conjugated microporous polymer through  
quaternization for efficient photodegradation of tetracycline and bisphenol

A

*Jianan Fan<sup>a,†</sup>, Qingxia Zhu<sup>b,†</sup>, Haoxi Wang<sup>b</sup>, Po Sun<sup>a,e,\*</sup>, Lingyun Xu<sup>c,\*</sup>, Hua Sun<sup>d,\*</sup>,  
Shiyuan Zhou<sup>b</sup>, Peiyang Gu<sup>b,\*</sup>*

<sup>a</sup>Institutes of Molecular Engineering and Applied Chemistry, Analysis and Testing Central Facility,  
Anhui University of Technology, Ma'anshan 243002, P. R. China. E-mail address:  
sunpoo@ahut.edu.cn (P. Sun);

<sup>b</sup>Jiangsu Key Laboratory of Advanced Catalytic Materials and Technology, School of  
Petrochemical Engineering, Changzhou University, Changzhou, 213164, PR China. E-mail address:  
gupeiyang0714@cczu.edu.cn (P. Gu);

<sup>c</sup>Analysis and Testing Center, Soochow University, Suzhou, 215123, China. E-mail address:  
lyxu@suda.edu.cn (L. Xu);

<sup>d</sup>School of Material and Chemistry Engineering, Xuzhou University of Technology, Xuzhou,  
221018, China. E-mail: iamsunhua@xzit.edu.cn (H. Sun);

<sup>e</sup>MaAnShan High-Tech Research Institute of Nanjing University, MaAnShan 238200, P. R. China.

## Contents

**Fig. S1** Comparative schematic of TC degradation by three photocatalysts prepared at different reactant ratios.

**Fig. S2** FT-IR spectra of TBPP、BBTz and [BTMA]Br.

**Fig. S3** The full XPS spectra, C 1s and S 2p high-resolution XPS spectra of (a-c) Por-BT-1 and (d-f) Por-BT-2.

**Fig. S4** The TGA curves of Por-BT-1 and Por-BT-2.

**Fig. S5** The water contact angles of Por-BT-1 and Por-BT-2.

**Fig. S6** The UV-vis diffuse reflectance absorption spectra of Por-BT-1 and Por-BT-2.

**Fig. S7** The percentage of BPA residues in Por-BT-2 after dark adsorption and photocatalytic degradation.

**Fig. S8** Photocatalytic reusability of Por-BT-2 in BPA degradation through five runs.

**Fig. S9** (a) The absorbance spectra of TC with different concentrations; (b) the corresponding standard curve.

**Fig. S10** (a) The photocatalytic degradation performance of TC and (b) BPA.

**Fig. S11** The residual rate of total organic carbons for Por-BT-1 in the removal of TC (10 ppm) and Por-BT-2 in the removal of BPA (10 ppm).

**Fig. S12** The ESR spectra of  $\text{DMPO}\cdot\text{OH}$ ,  $\text{DMPO}\cdot\text{O}_2^-$ ,  $\text{TEMP}\cdot^1\text{O}_2$ , and  $\text{TEMPO}\cdot\text{h}^+$  for (a-d) Por-BT-1 and (e-h) Por-BT-2 in the dark and under visible-light irradiation.

**Fig. S13** The LC-MS results of the photodegradation pathway of Por-BT-1 toward TC.

**Fig. S14** The LC-MS results of the photodegradation pathway of Por-BT-2 toward BPA.

**Fig. S15** The band gaps of Por-BT-1 and Por-BT-2.

**Table S1.** The surface areas and pore volumes of Por-BT-1 and Por-BT-2.

**Table S2.** Comparison of efficiency of removing BPA by different catalysts.

**Table S3.** Comparison of efficiency of removing TC by different catalysts.



## 1. Characterization

The FT-IR and ss  $^{13}\text{C}$  NMR spectra of the samples were recorded using a Nicolet 6700 Fourier Transform Infrared Spectrometer (Thermo Scientific, USA) and a Bruker INOVA 400 MHz NMR Spectrometer, respectively. The surface chemical properties of the catalyst were analyzed using X-ray photoelectron spectroscopy (XPS, ESCALAB 250, USA). The UV-Vis diffuse reflectance spectra (UV-Vis DRS) were measured using a U-3010 spectrometer (Hitachi, Japan). The surface morphologies of Por-BT-1 and Por-BT-2 were characterized by scanning electron microscopy (SEM, Merlin Compact, Japan). The BET surface area and pore size distribution were recorded by nitrogen adsorption-desorption isotherms at 77 K using a Micromeritics ASAP 2020 surface area analyzer. The thermal stability of the samples was evaluated by thermogravimetric analysis (TGA, TG209F3, Germany) with a heating rate of  $10^\circ\text{C min}^{-1}$  from  $30^\circ\text{C}$  to  $700^\circ\text{C}$ . The contact angle of the samples was measured using a droplet shape analyzer (Kruss, DSA25). The concentration of TC in aqueous solutions was analyzed by UV-Vis spectrophotometry (METASH X-8S, China), while the concentrations of BPA, BPAF, BPF, and BPS in solutions were determined by high-performance liquid chromatography (HPLC, Fuli LC5090, China). The photoelectrochemical properties of the catalysts were measured using a CHI760E electrochemical workstation (Chenhua, China). Radicals were detected by electron spin resonance spectroscopy (Bruker ESR 5000, Germany), and the total organic carbon (TOC) content was measured using a multi N/C analyzer (analytik-jena multi N/C 2100S, Germany). Reaction intermediates were analyzed by liquid chromatography-

mass spectrometry (LC-MS, Agilent 8860, California, USA).

## 2. Synthetic procedure

The synthetic procedures of Por-BT-1 and Por-BT-2 are shown in the manuscript.

Synthesis of Por-BT-L: 5,10,15,20-Tetra(4-bromophenyl) porphyrin (0.20 g, 0.20 mmol), 4,7-bis(4,4,5,5-tetramethyl-1,3,2-dioxaborolan-2-yl)-2,1,3-benzothiadiazole (0.04 g, 0.10 mmol), and tetrabutylammonium iodide (0.01 g, 0.06 mmol) were dissolved in 20 mL of 1,4-dioxane in a 100 mL Schlenk flask under a N<sub>2</sub> atmosphere. 1.40 mL of K<sub>2</sub>CO<sub>3</sub> aqueous solution (2 M) was then added, followed by the addition of tetrakis(triphenylphosphine)palladium (0.03 mg, 0.02 mmol) with continuous N<sub>2</sub> flow. The reaction was heated to 110 °C and stirred for 3 d. The mixture was then cooled to room temperature and filtered. The solid residue was extracted with methanol, dichloromethane, and tetrahydrofuran using a Soxhlet extractor, followed by drying in a vacuum oven at 60 °C to afford 0.06 g of Por-BT-L with a yield of 53.6%.

Synthesis of Por-BT-M: 5,10,15,20-Tetra(4-bromophenyl) porphyrin (0.20 g, 0.20 mmol), 4,7-bis(4,4,5,5-tetramethyl-1,3,2-dioxaborolan-2-yl)-2,1,3-benzothiadiazole (0.31 g, 0.80 mmol), and tetrabutylammonium iodide (0.01 g, 0.06 mmol) were dissolved in 20 mL of 1,4-dioxane in a 100 mL Schlenk flask under a N<sub>2</sub> atmosphere. 1.40 mL of K<sub>2</sub>CO<sub>3</sub> aqueous solution (2 M) was then added, followed by the addition of tetrakis(triphenylphosphine)palladium (0.03 mg, 0.02 mmol) with continuous N<sub>2</sub> flow. The reaction was heated to 110 °C and stirred for 3 d. The mixture was then cooled to room temperature and filtered. The solid residue was extracted with methanol, dichloromethane, and tetrahydrofuran using a Soxhlet extractor,

followed by drying in a vacuum oven at 60 °C to afford 0.18 g of Por-BT-M with a yield of 67.6%.

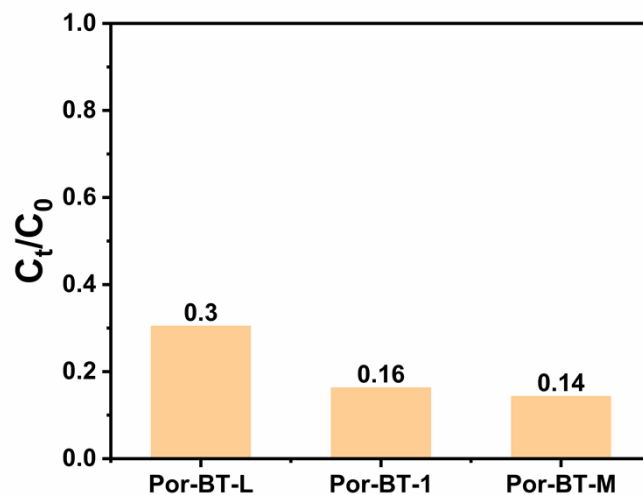

**Fig. S1** Comparative schematic of TC degradation by three photocatalysts prepared at different reactant ratios.

### 3. Photoelectrochemical characterization

For the measurement of Mott-Schottky plots, transient photocurrent response, and electrochemical impedance spectroscopy (EIS), a three-electrode system was used. The working electrode was prepared by dropping 200  $\mu\text{L}$  of the mixture onto an ITO glass substrate (1 cm  $\times$  2 cm  $\times$  0.1 cm). An Ag/AgCl electrode was used as the reference electrode, and a platinum sheet served as the counter electrode. The measurements were conducted in a 0.1 M sodium sulfate aqueous solution. A suspension was prepared by dispersing 5 mg of the sample in 1 mL of ethanol containing 20  $\mu\text{L}$  of Nafion solution, followed by sonication. A 300 W xenon lamp was employed as the light source for the photoelectrochemical tests.

### 4. Radical detection

To investigate the photocatalytic degradation properties, 10 mg of Por-BT-1 was dispersed in 20 mL of TC solution (10 ppm). Sodium ethylenediaminetetraacetate (EDTA-2Na) (8 mg) was added to scavenge holes ( $h^+$ ). The solution was then irradiated with a 300W xenon lamp. Following this, the procedures were the same as those used in the aforementioned photocatalytic degradation experiments. Similarly,  $\beta$ -carotene (8 mg) was added to scavenge singlet oxygen ( $^1O_2$ ). In a separate experiment, 10 mg of Por-BT-1 was dispersed in 19.8 mL of TC solution (10 ppm), with 200  $\mu$ L of isopropanol (IPA, AR, 99.5%) added to scavenge hydroxyl radicals ( $\bullet OH$ ). For the scavenging of superoxide radicals ( $\bullet O_2^-$ ), 10 mg of Por-BT-1 was dispersed in 19.6 mL of TC solution (10 ppm), and 400  $\mu$ L of a TEMPO solution (1 g/L) was added.

To assess the photocatalytic activity, 5 mg of Por-BT-2 was dispersed in 10 mL of BPA solution (10 ppm). Sodium EDTA-2Na (4 mg) was added to scavenge  $h^+$ , and the solution was subsequently irradiated with a 300W xenon lamp. The subsequent steps followed the same procedures as those used in the previously described photocatalytic degradation experiments. Similarly,  $\beta$ -carotene (4 mg) was added to scavenge  $^1O_2$ . In another experiment, 5 mg of Por-BT-2 was dispersed in 9.9 mL of BPA solution (10 ppm), with 100  $\mu$ L of IPA, (AR, 99.5%) added to scavenge  $\bullet OH$ . For scavenging  $\bullet O_2^-$ , 5 mg of Por-BT-2 was dispersed in 9.8 mL of BPA solution (10 ppm), and 200  $\mu$ L of a p-Benzoquinone (p-BQ) solution (1 g/L) was added.

## **5. Degradation pathways**

Analysis was performed using a high-performance liquid chromatography coupled with a single quadrupole mass spectrometer (LC-MS). For the detection of degradation

intermediates of TC, a gradient elution was carried out using a 0.1% (v/v) formic acid aqueous solution (A) and acetonitrile (B) as mobile phases. The flow rate was set at 0.3 mL/min with an injection volume of 20  $\mu$ L, and the column temperature was maintained at 30°C. The analysis was conducted in negative electrospray ionization (ESI<sup>-</sup>) mode.

For the detection of BPA degradation intermediates, a mixture of ultrapure water and methanol (v/v=30/70) was used as the mobile phase, with a flow rate of 1 mL/min and an injection volume of 20  $\mu$ L. The column temperature was set to 35°C, and the analysis was performed in negative electrospray ionization (ESI<sup>-</sup>) mode.

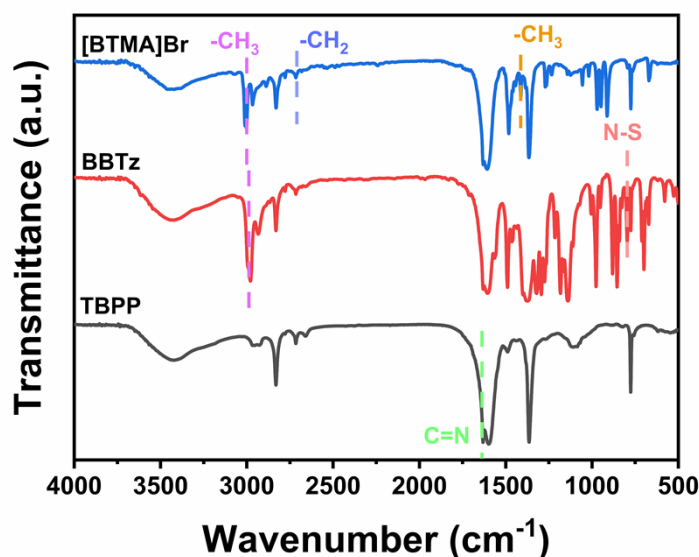

**Fig. S2** FT-IR spectra of TBPP, BBTz and [BTMA]Br. (TBPP: 5,10,15,20-tetrakis(4-bromophenyl)porphyrin, BBTz: 4,7-bis(4,4,5,5-tetramethyl-1,3,2-dioxaborolan-2-yl)benzo[c][1,2,5]thiadiazole, [BTMA]Br: (2-Bromoethyl)trimethylammonium bromide)



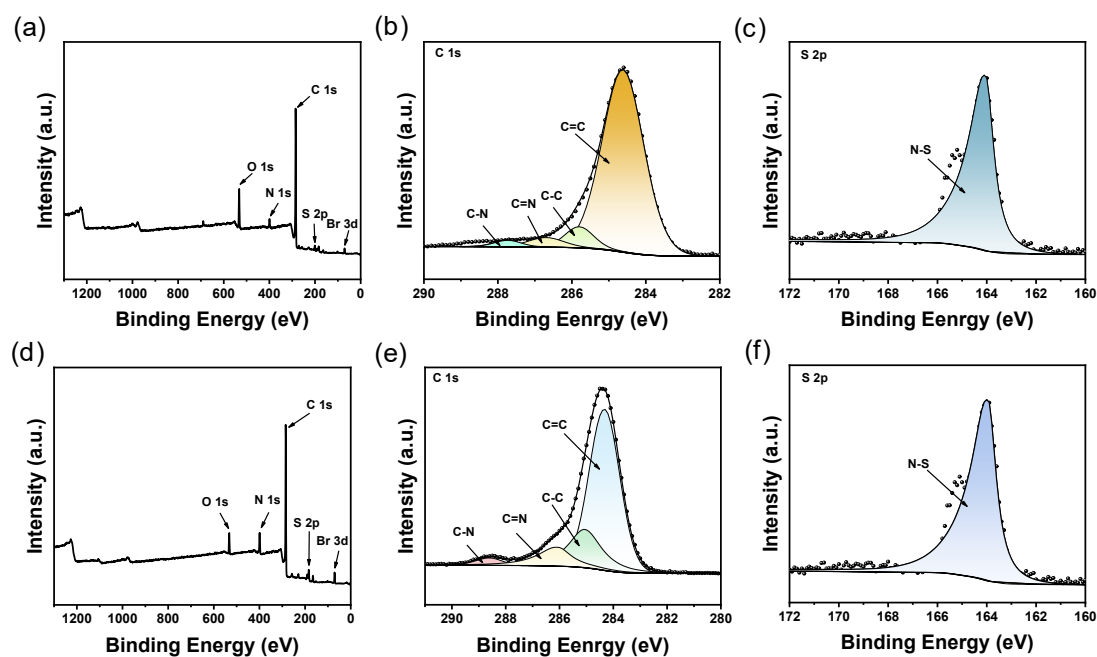

**Fig. S3** The full XPS spectra, C 1s and S 2p high-resolution XPS spectra of (a-c) Por-BT-1 and (d-f) Por-BT-2.

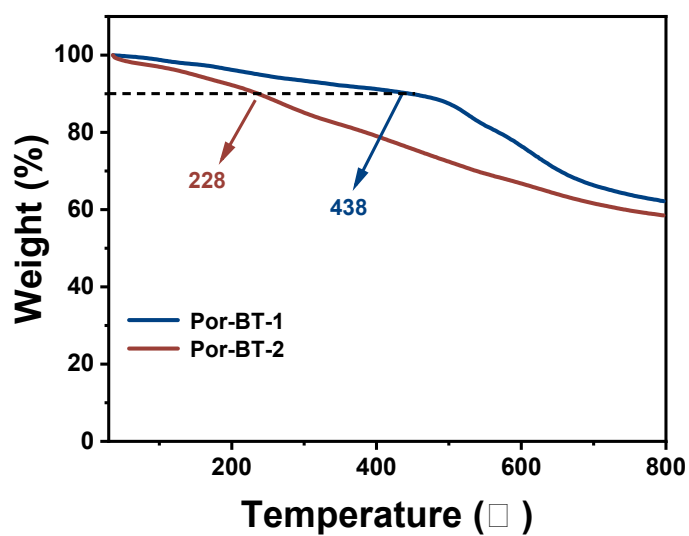

**Fig. S4** The TGA curves of Por-BT-1 and Por-BT-2.

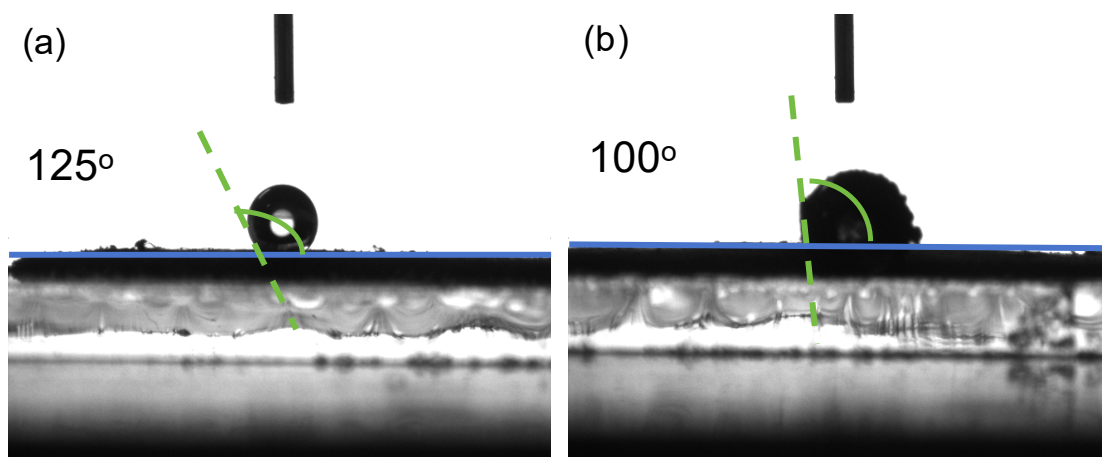

**Fig. S5** The water contact angles of Por-BT-1 and Por-BT-2.

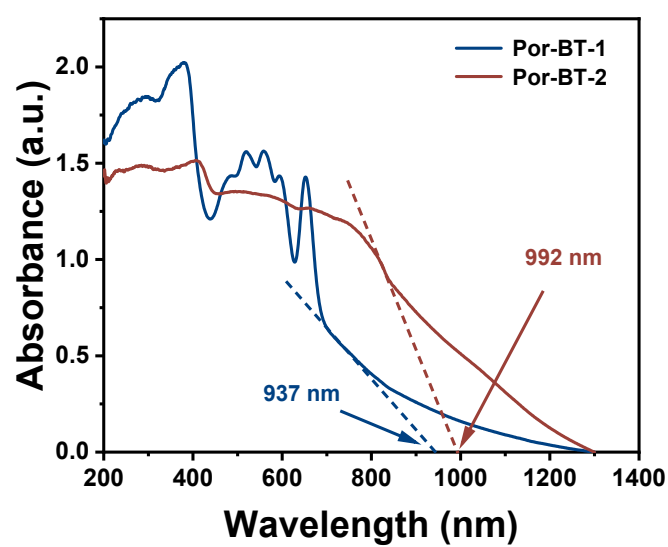

**Fig. S6** The UV-vis diffuse reflectance absorption spectra of Por-BT-1 and Por-BT-2.

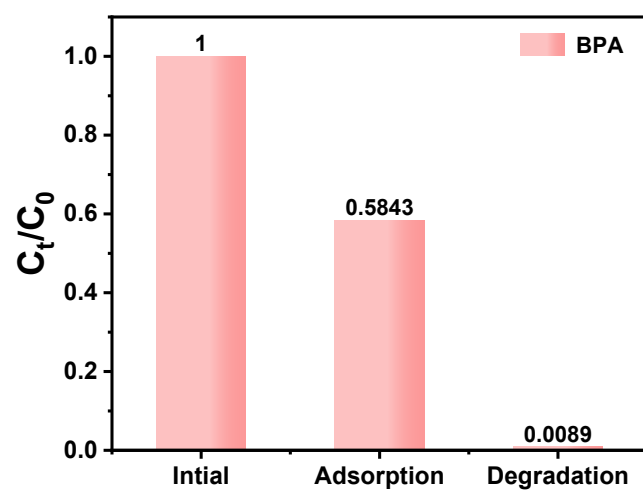

**Fig. S7** The percentage of BPA residues in Por-BT-2 after dark adsorption and photocatalytic degradation.

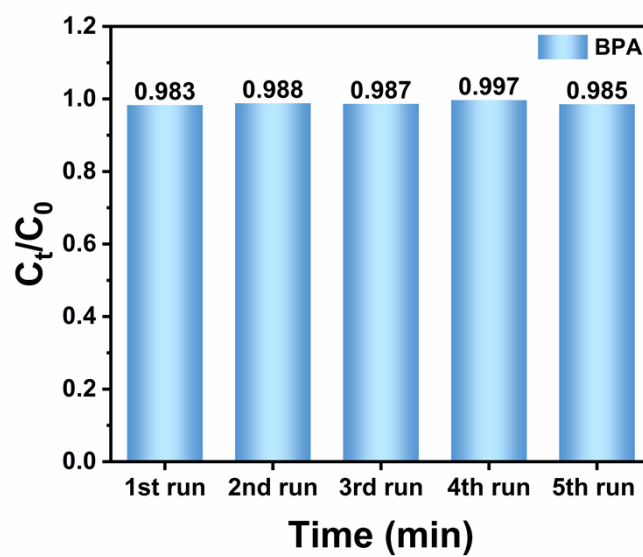

**Fig. S8** Photocatalytic reusability of Por-BT-2 in BPA degradation through five runs.

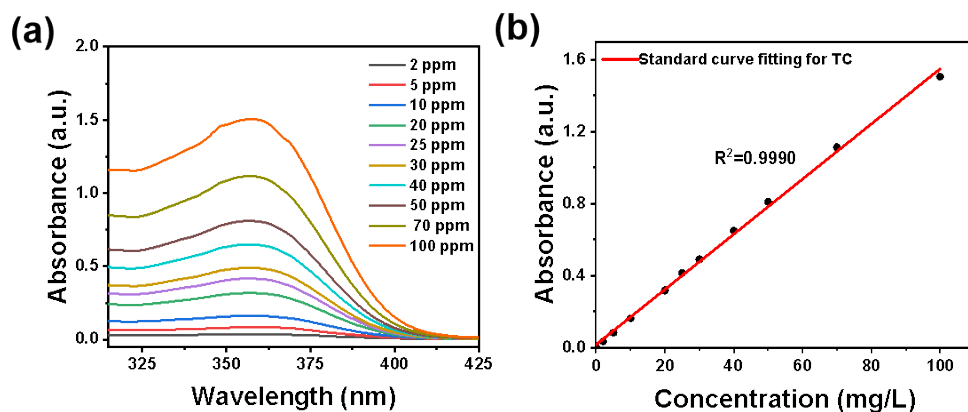

**Fig. S9** (a) The absorbance spectra of TC with different concentrations; (b) the corresponding standard curve.

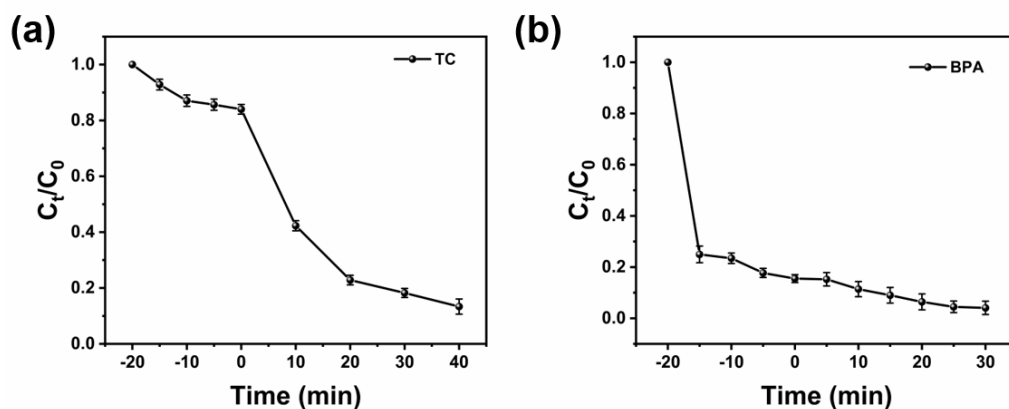

**Fig. S10** (a) The photocatalytic degradation performance of TC and (b) BPA.

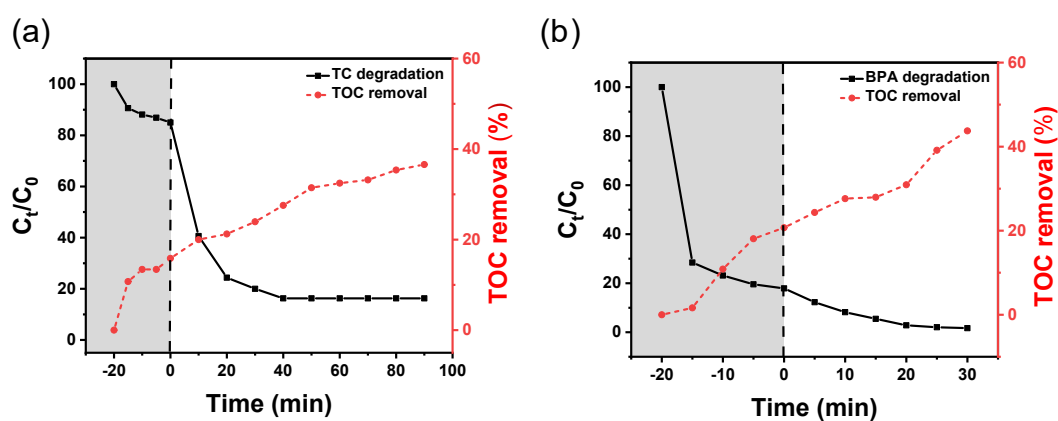

**Fig. S11** The residual rate of total organic carbons for Por-BT-1 in the removal of TC (10 ppm) and Por-BT-2 in the removal of BPA (10 ppm).

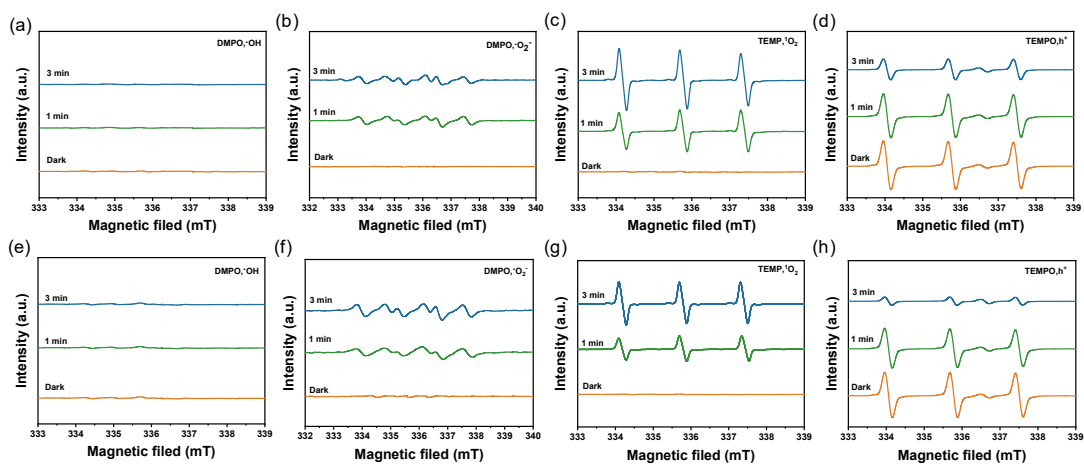

**Fig. S12** The ESR spectra of  $\text{DMPO}\cdot\text{OH}$ ,  $\text{DMPO}\cdot\text{O}_2^-$ ,  $\text{TEMP}\cdot^1\text{O}_2$ , and  $\text{TEMPO}\cdot\text{h}^+$  for (a-d) Por-BT-1 and (e-h) Por-BT-2 in the dark and under visible-light irradiation.

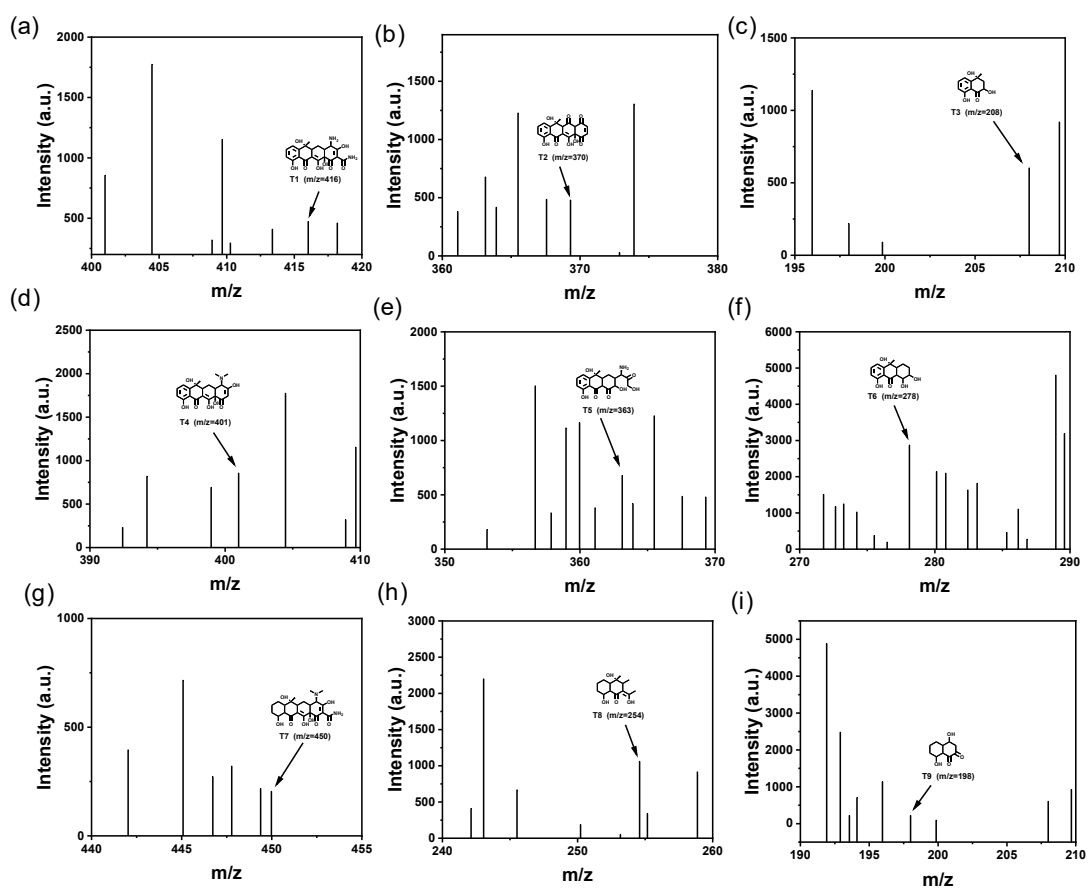

**Fig. S13** The LC-MS results of the photodegradation pathway of Por-BT-1 toward TC.

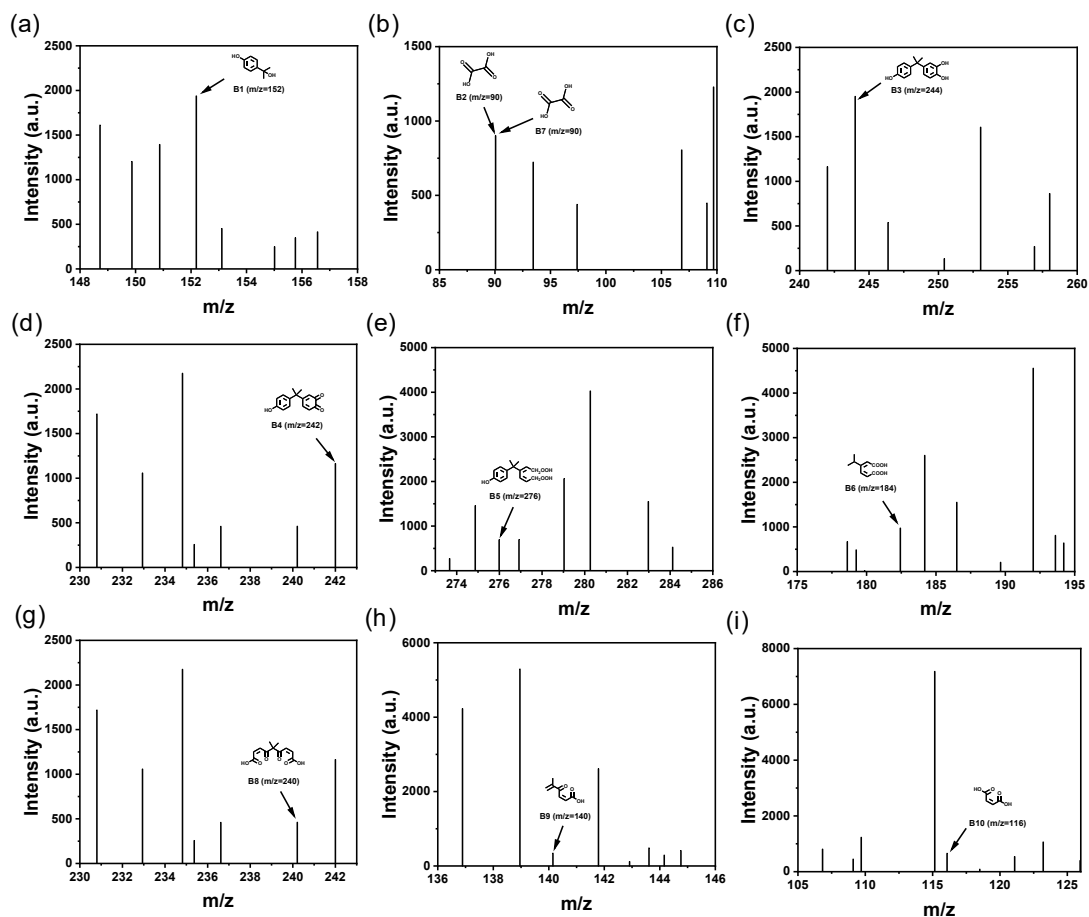

**Fig. S14** The LC-MS results of the photodegradation pathway of Por-BT-2 toward BPA.

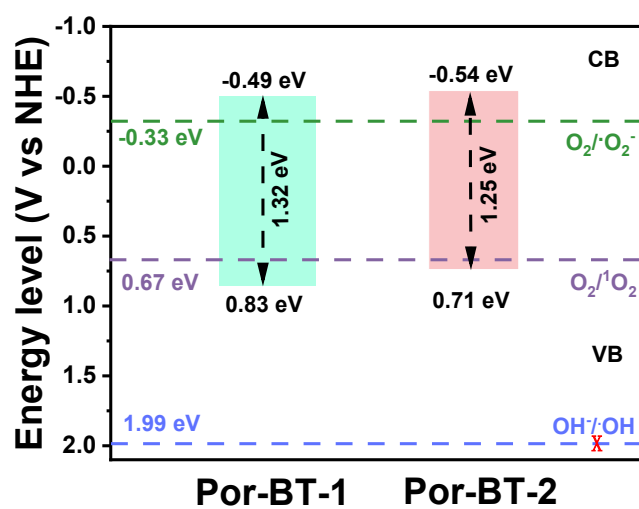

**Fig. S15** The band gaps of Por-BT-1 and Por-BT-2.

**Table S1** The surface areas and pore volumes of Por-BT-1 and Por-BT-2.

| Sample   | BET surface area $S_{\text{BET}}$<br>( $\text{m}^2 \text{g}^{-1}$ ) | Total pore valume<br>( $\text{cm}^3 \text{g}^{-1}$ ) | Pore size distribution<br>(nm) |
|----------|---------------------------------------------------------------------|------------------------------------------------------|--------------------------------|
| Por-BT-1 | 74.37                                                               | 0.13                                                 | 6.73                           |
| Por-BT-2 | 190.08                                                              | 0.17                                                 | 2.8                            |

**Table S2.** Comparison of efficiency of removing BPA by different catalysts.

| Catalysts                             | Dosage<br>( $\text{g L}^{-1}$ ) | $C_{\text{BPA}}$<br>(ppm) | Time<br>(min) | Efficiency<br>(%) | Reference        |
|---------------------------------------|---------------------------------|---------------------------|---------------|-------------------|------------------|
| Pristine $\text{TiO}_2$               | 1                               | 2.5                       | 60            | 22                | 1                |
| Nano PDI                              | 0.5                             | 5                         | 480           | 94                | 2                |
| g- $\text{C}_3\text{N}_4\text{NS+PS}$ | 0.5                             | 5                         | 90            | 10                | 3                |
| $\pi$ -conjugated-PDI                 | 0.5                             | 5                         | 120           | 99.7              | 4                |
| SKA-CN                                | 0.3                             | ~10                       | 100           | 98                | 5                |
| Co-MiL-53- $\text{NH}_2$ -BT          | 0.25                            | 10                        | 120           | 99.9              | 6                |
| OCN 6                                 | 0.2                             | 10                        | 120           | 98.68             | 7                |
| PDINH                                 | 0.5                             | 10                        | 480           | 82                | 8                |
| g- $\text{C}_3\text{N}_4$             | 1                               | 10                        | 180           | 30                | 9                |
| <b>Por-BT-2</b>                       | <b>0.5</b>                      | <b>10</b>                 | <b>30</b>     | <b>98.3</b>       | <b>This work</b> |

**Table S3.** Comparison of efficiency of removing TC by different catalysts.

| Catalysts                                                | Dosage<br>( $\text{g L}^{-1}$ ) | $C_{\text{TC}}$<br>(ppm) | Time<br>(min) | Efficiency<br>(%) | Reference |
|----------------------------------------------------------|---------------------------------|--------------------------|---------------|-------------------|-----------|
| $\text{Bi}_2\text{S}_3/\text{MIL-53(Fe)}$                | 0.1                             | 10                       | 180           | 90.9              | 10        |
| Mn-Sr $\text{TiO}_3$                                     | 1                               | 10                       | 60            | 66.7              | 11        |
| $\text{Ag}_3\text{PO}_4/\text{CuBi}_2\text{O}_4$         | 0.5                             | 10                       | 60            | 75                | 12        |
| $\text{Bi}_2\text{O}_2\text{CO}_3/\text{Ti}_3\text{C}_2$ | 0.5                             | 20                       | 120           | 31                | 13        |
| CuPT-CPP                                                 | 0.25                            | 10                       | 210           | 100               | 14        |
| Ag@MOF-525                                               | 0.4                             | 10                       | 200           | 81                | 15        |

|                         |            |           |           |             |                  |
|-------------------------|------------|-----------|-----------|-------------|------------------|
| Py-NH <sub>2</sub> -COF | 0.2        | 10        | 90        | 3.1         | 16               |
| <b>Por-BT-1</b>         | <b>0.5</b> | <b>10</b> | <b>40</b> | <b>83.7</b> | <b>This work</b> |

## References

1. Xu, L.; Yang, L.; Johansson, E. M. J.; Wang, Y.; Jin, P., *Chem. Eng. J.* 2018, **350**, 1043-1055.
2. Wang, J.; Shi, W.; Liu, D.; Zhang, Z.; Zhu, Y.; Wang, D., *Appl. Catal., B.* 2017, **202**, 289-297.
3. Liu, B.; Qiao, M.; Wang, Y.; Wang, L.; Gong, Y.; Guo, T.; Zhao, X., *Chemosphere.* 2017, **189**, 115-122.
4. Zhang, Y.; Wang, D.; Liu, W.; Lou, Y.; Zhang, Y.; Dong, Y.; Xu, J.; Pan, C.; Zhu, Y., *Appl. Catal., B.* 2022, **300**, 120762.
5. Xu, L.; Li, L.; Yu, L.; Yu, J. C., *Chem. Eng. J.* 2022, **431**, 134241.
6. Lv, S.-W.; Liu, J.-M.; Zhao, N.; Li, C.-Y.; Wang, Z.-H.; Wang, S., *J. Hazard. Mater.* 2020, **387**, 122011.
7. Long, X.; Feng, C.; Yang, S.; Ding, D.; Feng, J.; Liu, M.; Chen, Y.; Tan, J.; Peng, X.; Shi, J.; Chen, R., *Chem. Eng. J.* 2022, **435**, 134835.
8. Liu, D.; Wang, J.; Bai, X.; Zong, R.; Zhu, Y., *Adv. Mater.* 2016, **28**, 7284-7290.
9. Jing, L.; Wang, D.; He, M.; Xu, Y.; Xie, M.; Song, Y.; Xu, H.; Li, H., *J. Hazard. Mater.* 2021, **401**, 123309.
10. Xie, J.; Tang, Y.; Chen, F.; Hao, C. C., *J. Phys. Chem. Solids.* 2023, **181**, 111551.
11. Wu, G.; Li, P.; Xu, D.; Luo, B.; Hong, Y.; Shi, W.; Liu, C., *Appl. Surf. Sci.* 2015, **333**, 39-47.
12. Shi, W.; Guo, F.; Yuan, S., *Appl. Catal., B.* 2017, **209**, 720-728.
13. Tan, B.; Fang, Y.; Chen, Q.; Ao, X.; Cao, Y., *J. Colloid Interface Sci.* 2021, **601**, 581-593.
14. Xu, Z.; Dong, W.; Cui, X.; Duan, Q., *Chemosphere.* 2024, **355**, 141801.
15. Guo, A.; Wang, X.; Liu, H.; Li, X.; Yang, L.; Yang, W., *Surf. Interfaces.* 2023, **38**, 102843.



16. Hu, Z.; Luo, Y.; Wang, L.; Wang, Y.; Wang, Q.; Jiang, G.; Zhang, Q.; Cui, F., *ACS Appl. Polym. Mater.* 2023, **5**, 9263-9273.
